# Supplementary material for: Kinetic and equilibrium studies of the reactions of 4-nitrobenzofurazan and some derivatives with sulfite ions in water. Evidence for the Boulton–Katritzky rearrangement in a σ-adductElectronic supplementary information (ESI) available: Tables S1–S4. See http://www.rsc.org/suppdata/p2/b1/b108591n/
Source: Royal Society of Chemistry journal article supplement (doi:10.1039/b108591n), 2002-01-14
Supplement: b108591n.doc [file b108591n.doc]

# Supplementary data

Table S1

Kinetic and equilibrium data for reaction of **4** with sulfite ions in water at 25C and pH 4a.

| [SO32–]Free/10–6 mol dm3 | kobs/s–1 | kcalcb/s–1 | Absc | K5/105 dm3 mol–1 |
| --- | --- | --- | --- | --- |
| 2.23 | 0.048 | 0.053 | 0.112 | 1.7 |
| 4.46 | 0.063 | 0.070 | 0.181 | 1.9 |
| 6.24 | 0.085 | 0.084 | 0.222 | 2.0 |
| 8.90 | 0.10 | 0.10 | 0.253 | 2.0 |
| 13.4 | 0.14 | 0.14 | 0.289 | 2.0 |
| 17.8 | 0.18 | 0.17 | 0.303 | 1.9 |
| 104 | - | - | 0.395 |  |

a Acetate buffers.

b Calculated from eqn. (1) with k5 7500 dm3 mol–1 s–1 and k–5 0.037 s–1. Measured at 383 nm.

c Decrease in absorbance at 383 nm on adduct formation.

d Calculated as Abs/(0.395-Abs)[SO32–]Free.

Table S2

Kinetic and equilibrium data for reaction of **4** with sulfite ions at 25C and pH 5a

| [SO32–]Free/10–5 mol dm3 | kobs/s–1 | kcalcb/s–1 | Absc | K5/105 dm3 mol–1 |
| --- | --- | --- | --- | --- |
| 2.23 | 0.20 | 0.23 | 0.329 | 2.0 |
| 4.46 | 0.36 | 0.42 | 0.365 | 2.2 |
| 6.24 | 0.57 | 0.57 | 0.383 | - |
| 8.90 | 0.78 | 0.80 | 0.389 | - |
| 13.4 | 1.17 | 1.18 | 0.396 | - |
| 17.8 | 1.55 | 1.55 | 0.401 | - |
| 500 | - |  | 0.401 |  |

a Acetate buffers

b Calculated from eqn. (1) with k5 8500 dm3 mol–1 s–1 and k–5 0.04 s–1. Measured at 383 nm.

c Decrease in absorbance at 383 nm on adduct formation.

d Calculated as Abs/(0.401–Abs) [SO32–]Free.

Table S3

Kinetic and equilibrium data for reaction of **5** with sulfite ions in water at 25C at pH 3.8.a

| [SO32–]Free/10–6 mol dm3 | kobs/s–1 | kcalcb/s–1 | Abs | K5/106 dm3 mol–1 |
| --- | --- | --- | --- | --- |
| 1.47 | 0.038 | 0.039 | 0.155 | 1.0 |
| 2.94 | 0.064 | 0.063 | 0.200 | 1.1 |
| 4.12 | 0.079 | 0.082 | 0.214 | 1.1 |
| 5.89 | 0.11 | 0.11 | 0.216 | 0.8 |
| 8.83 | 0.16 | 0.16 | 0.231 | 0.9 |
| 11.8 | 0.22 | 0.21 | - |  |
| 104 | - | - | 0.26 |  |

a Acetate buffers.

b Calculated from eqn. (1) with k5 1.6  104 dm3 mol–1 s–1 and k–5 0.016 s–1. Measured at 330 nm.

c Increase in absorbance at 330 nm on adduct formation.

d Calculated as Abs/(0.26–Abs) [SO32–]Free.

Table S4

Kinetic data for reaction of **5** with sulfite ions in water at 25C and pH 4.87a

| [SO32–]Free/10–5 mol dm–3 | kobsb (330)/s–1 | kobsc (380)/s–1 | kobsd/[SO32–]Free  dm3 mol–1 s–1 |
| --- | --- | --- | --- |
| 1.65 | 0.25 | 0.23 | 1.5  104 |
| 3.30 | 0.54 | 0.54 | 1.6  104 |
| 4.62 | 0.66 | 0.63 | 1.4  104 |
| 6.60 | 0.97 | 0.90 | 1.4  104 |
| 9.91 | 1.52 | 1.45 | 1.5  104 |
| 13.2 | 2.06 | 1.98 | 1.5  104 |

a Acetate buffers.

b Colour forming reaction.

c Colour fading reaction.

d Corresponds to k5.
